# Supplementary material for: Lactobacillus crispatus reverses Escherichia coli-induced inflammatory injury and migration of cervical cancer cells by inhibiting ferroptosis
Source: Research Square preprint supplement (doi:10.21203/rs.3.rs-6435097/v1), 2025-04-28
Supplement: Supplementary file 1 [file ccdceedc663f23669c3abd37.pdf]

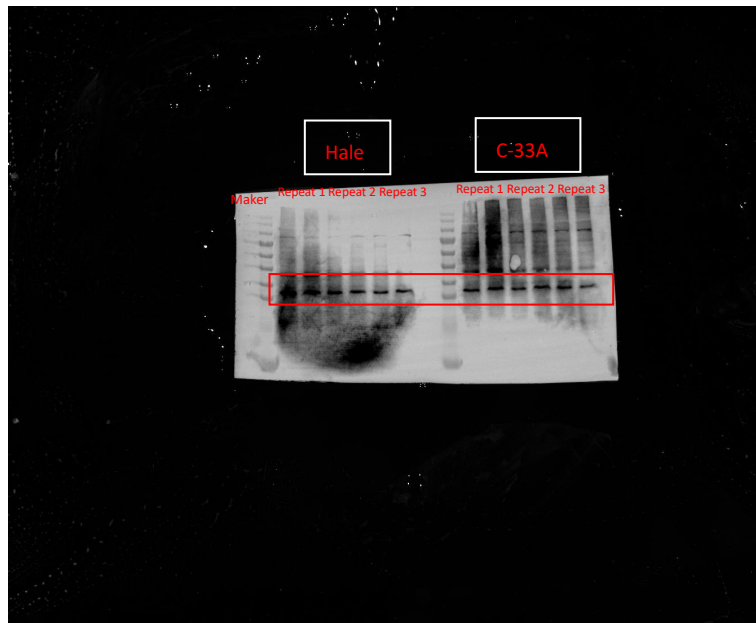

GPX4 (Left: HeLa; Right: C-33A)

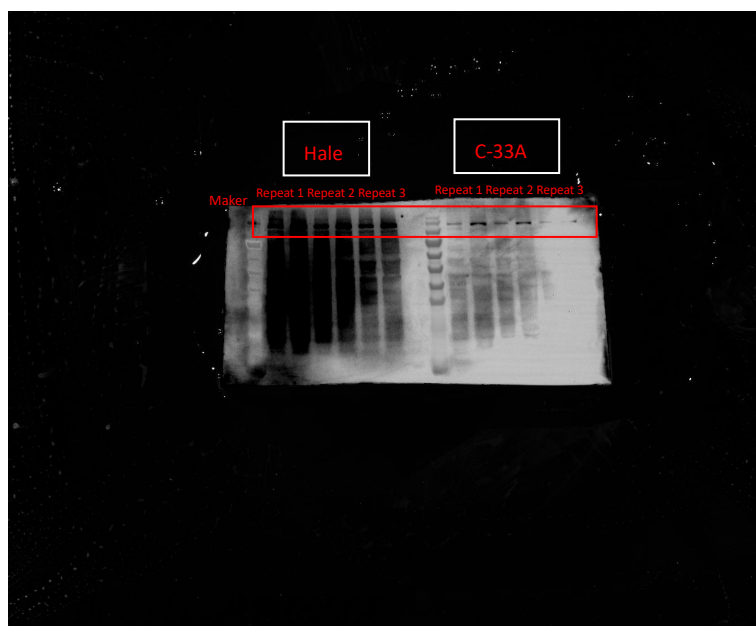

SLC3A2 (Left: HeLa; Right: C-33A)

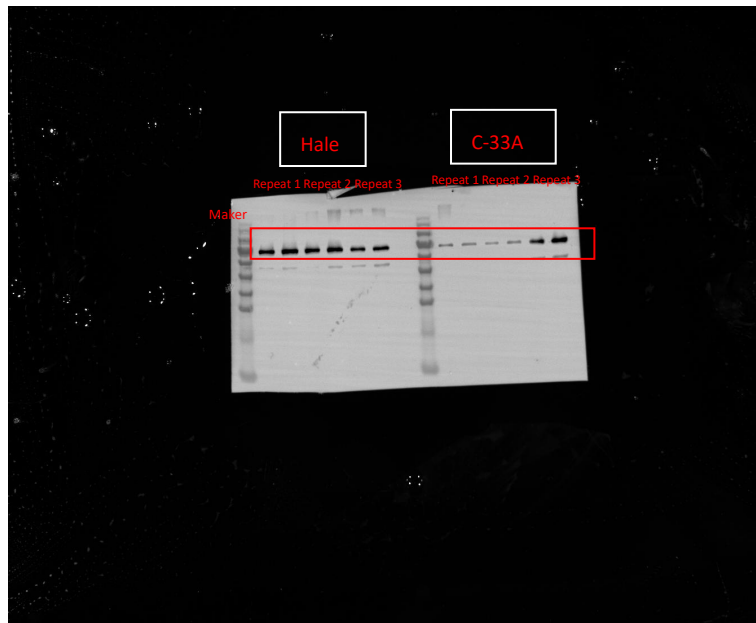

SLC7A11 (Left: HeLa; Right: C-33A)

Fig.S1

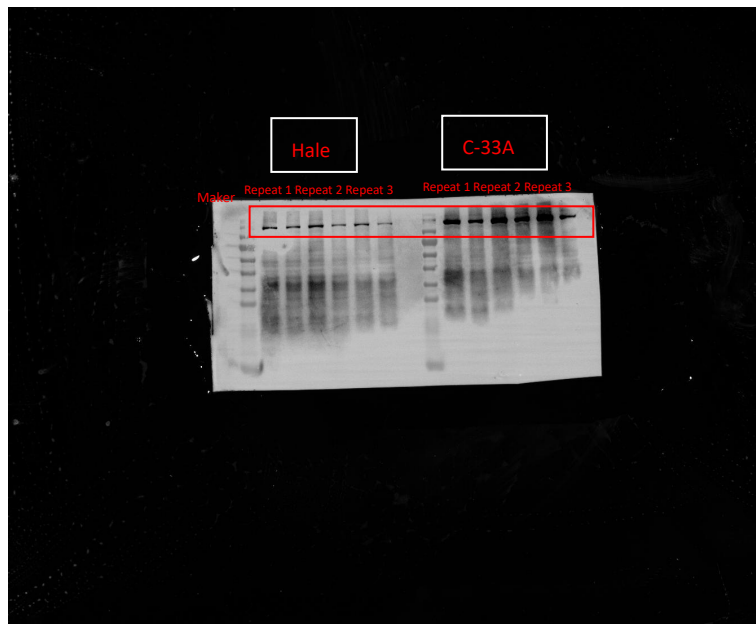

E-cadherin (Left: HeLa; Right: C-33A)

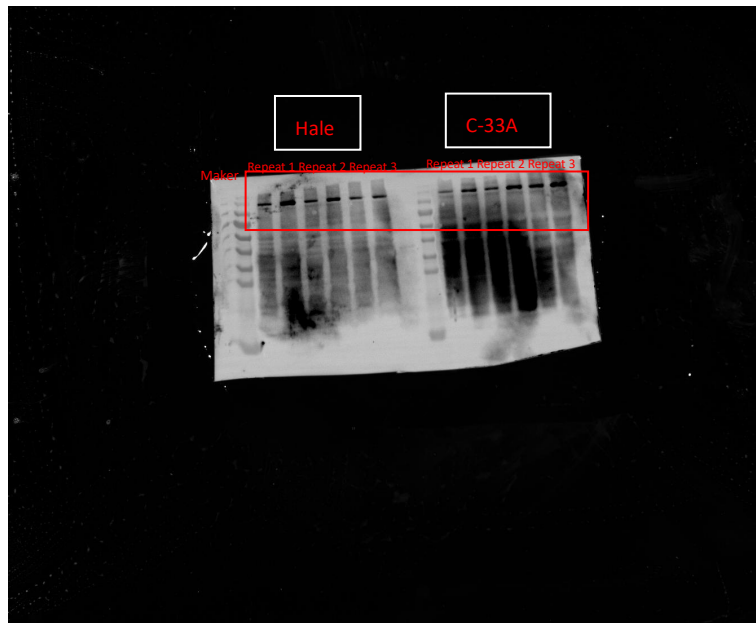

N-cadherin (Left: Hela; Right: C-33A)

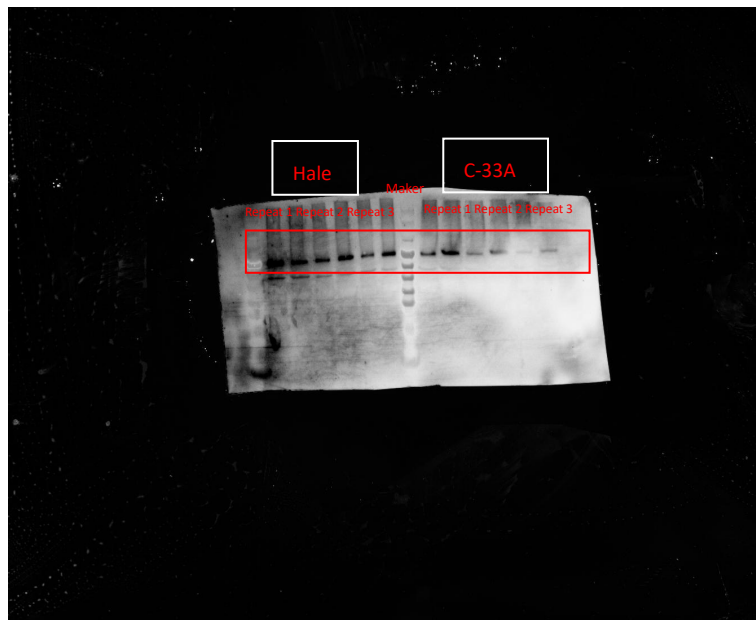

Vimentin (Left: Hela; Right: C-33A)

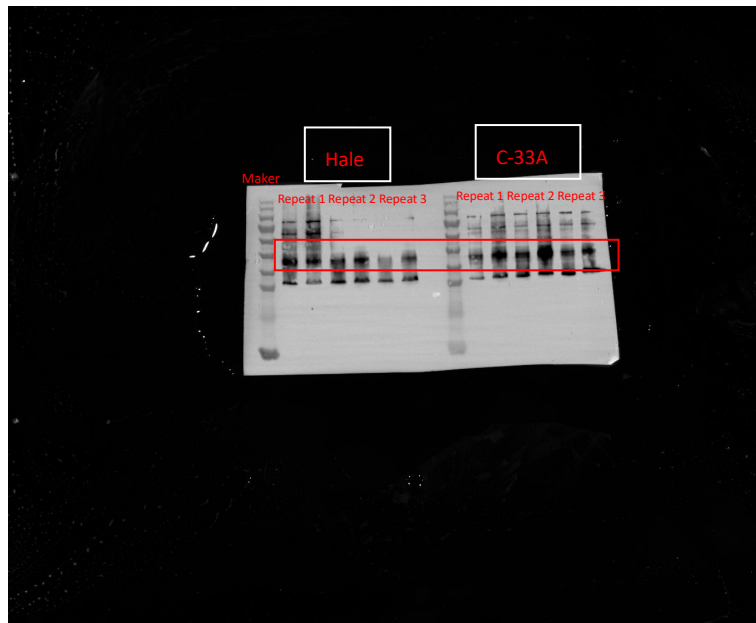

Snail (Left: Hela; Right: C-33A)

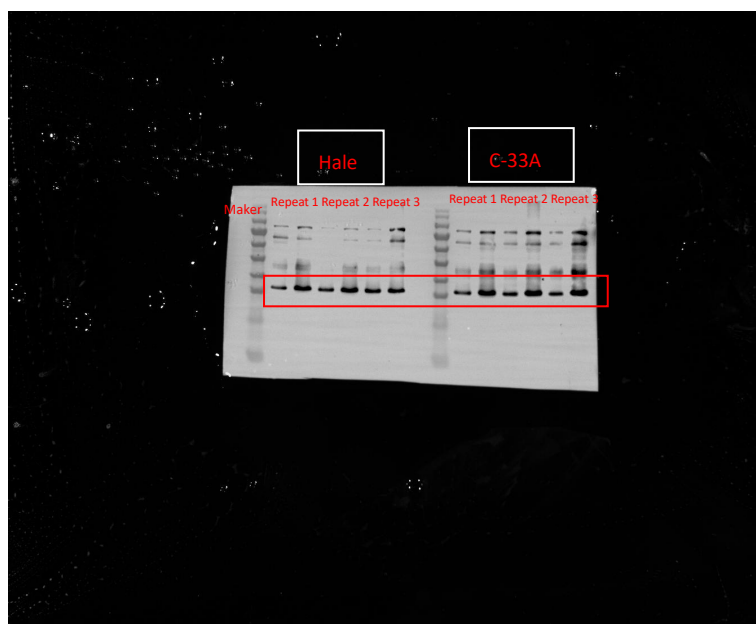

Slug (Left: Hela; Right: C-33A)

Fig.S2

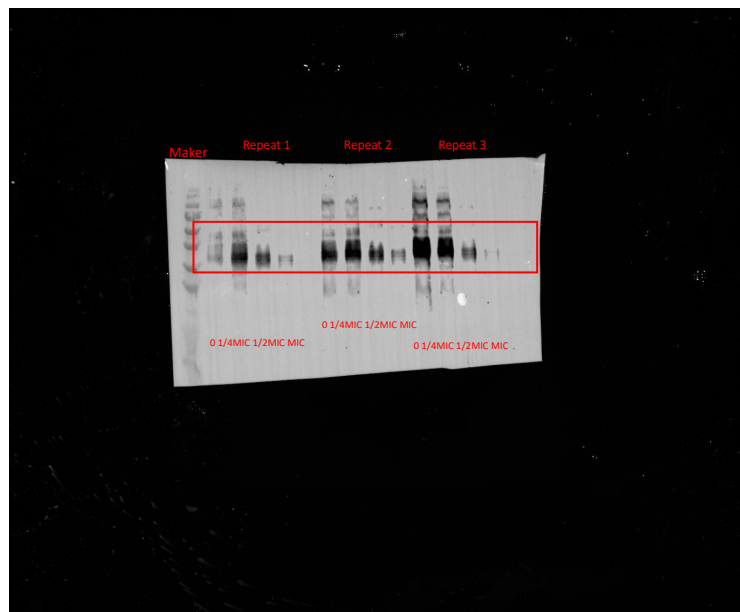

Lipoprotein p27

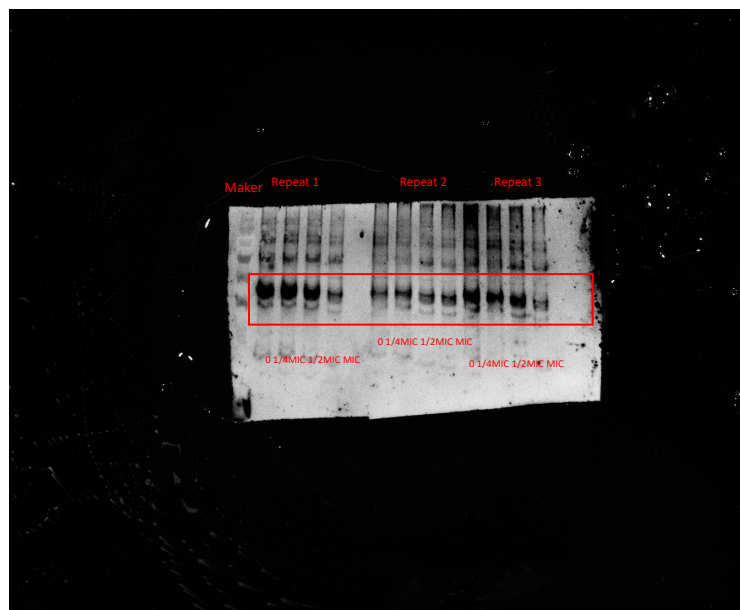

ompA

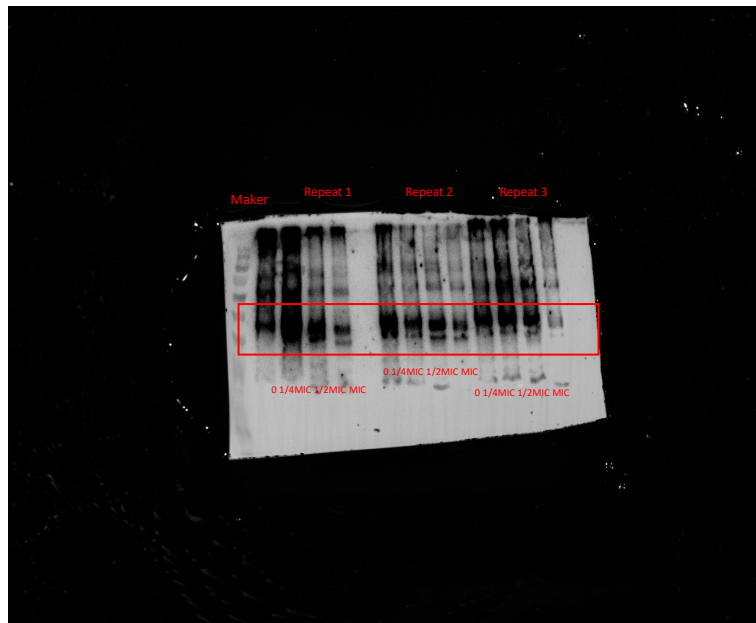

ompC

Fig.S3

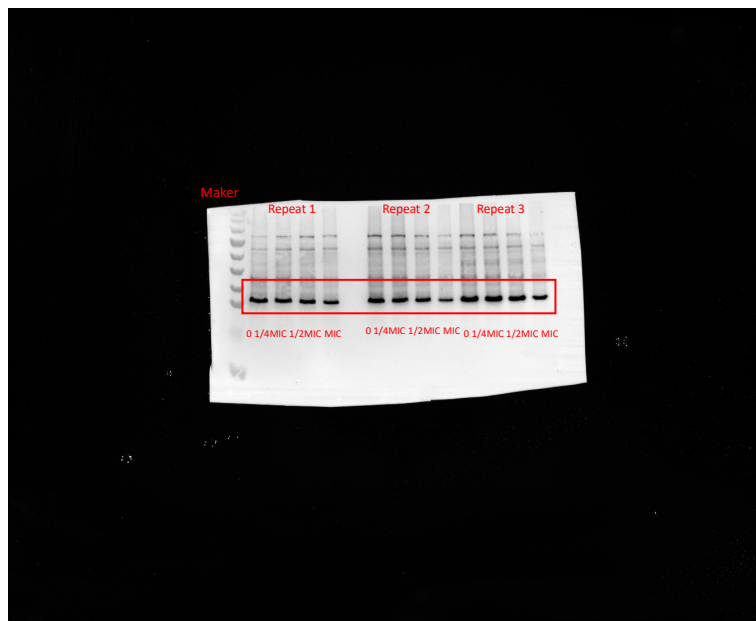

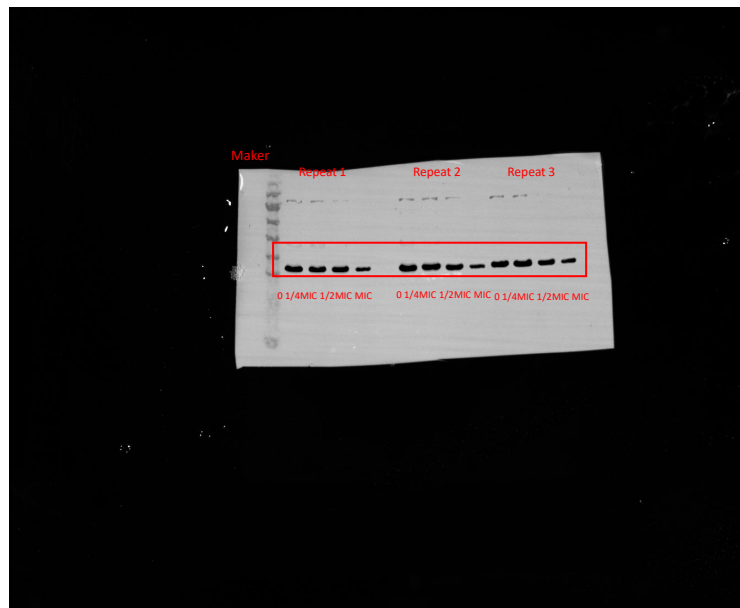

GPX4 (Up: Hela; Down: C-33A)

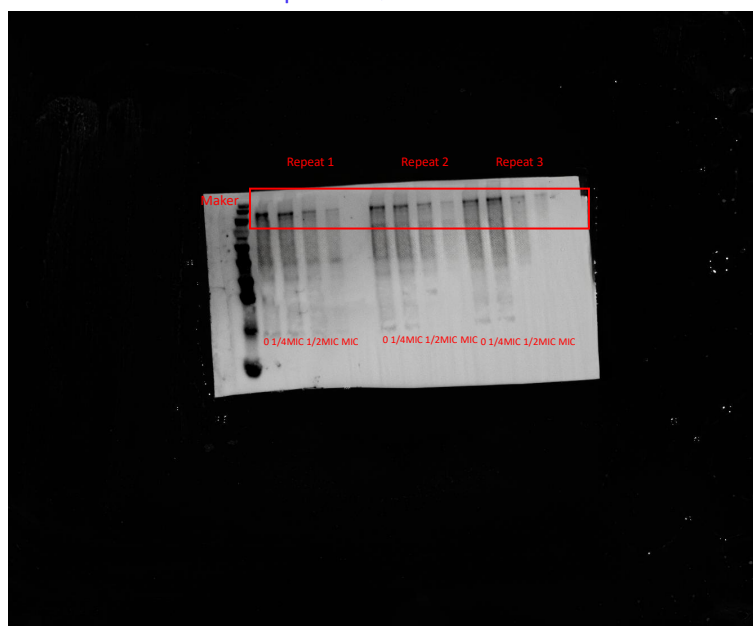

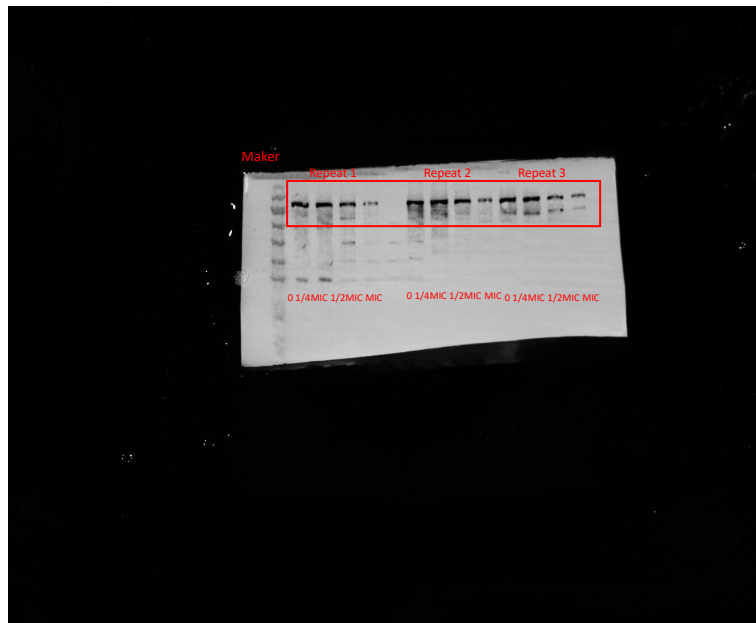

SLC3A2 (Up: HeLa; Down: C-33A)

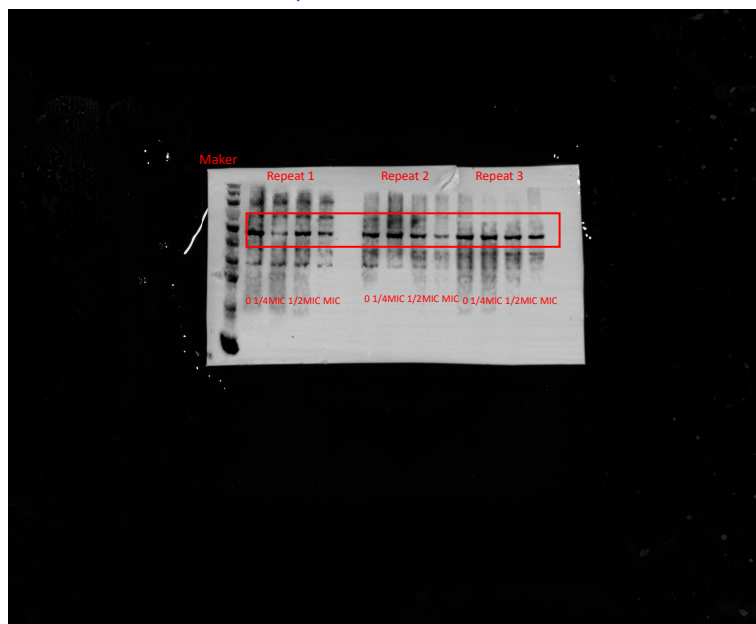



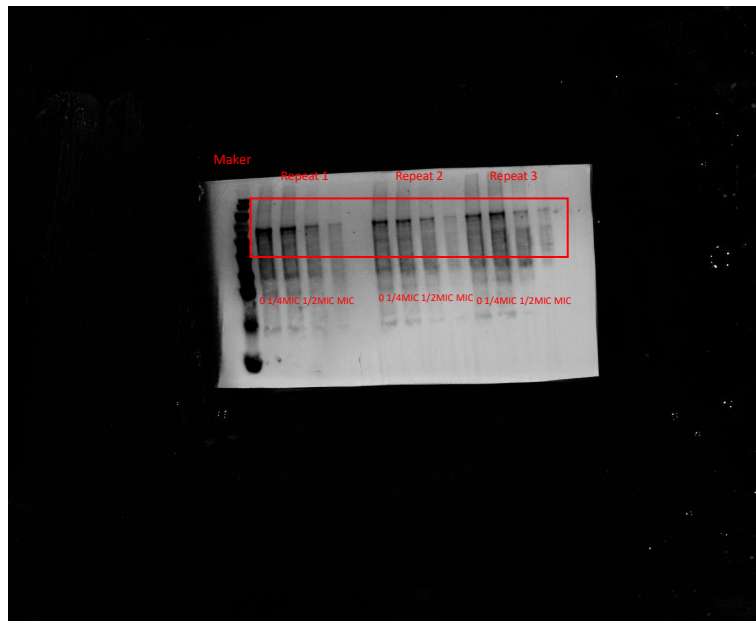

SLC7A11 (Up: HeLa; Down: C-33A)

Fig.S4

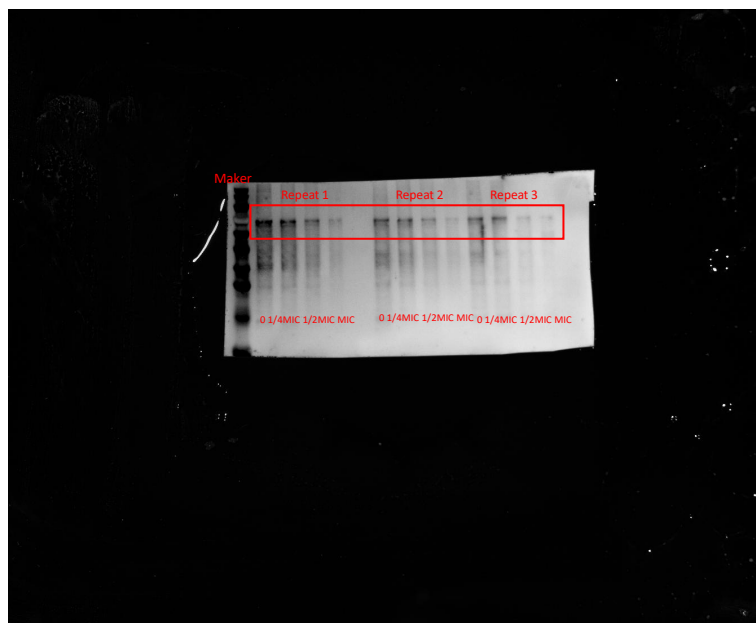

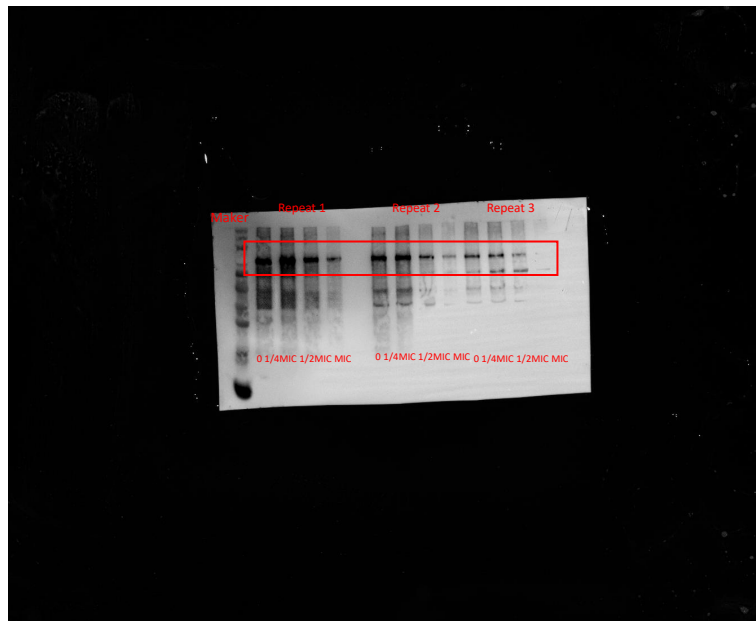

NF-KB (Up: HeLa; Down: C-33A)

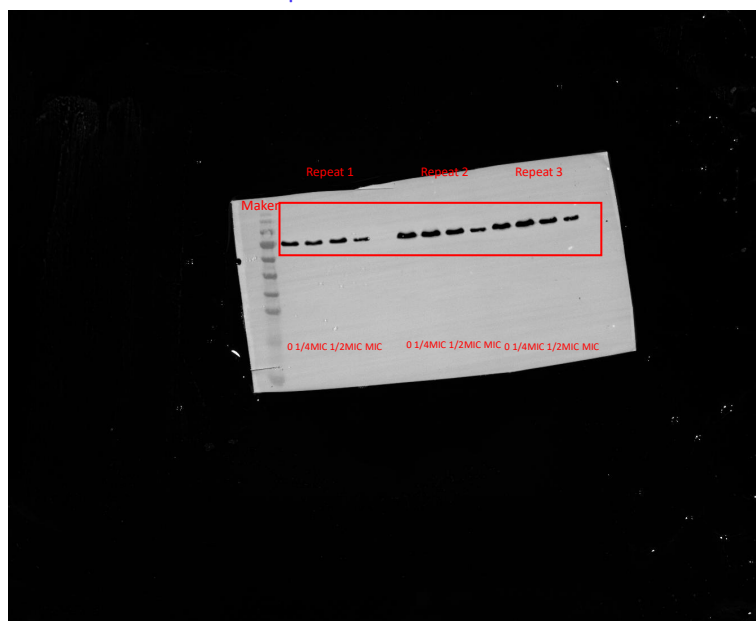

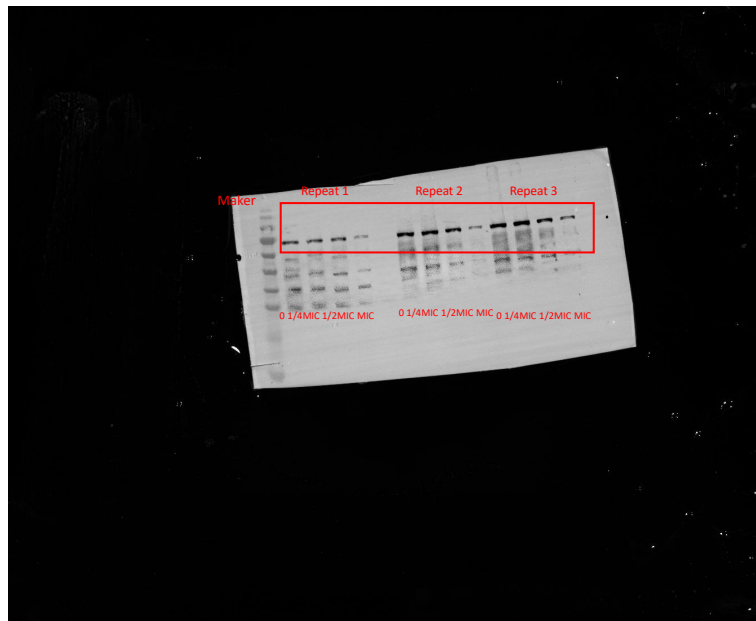

COX2 (Up: HeLa; Down: C-33A)

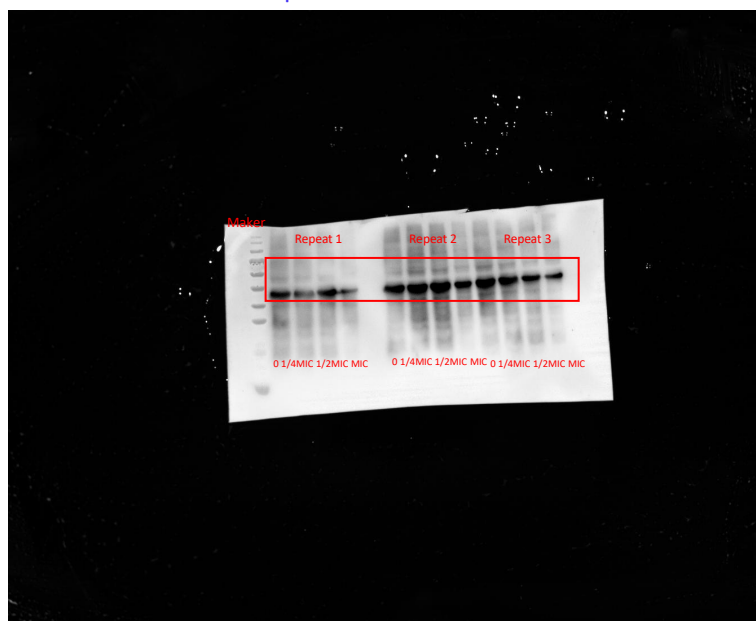

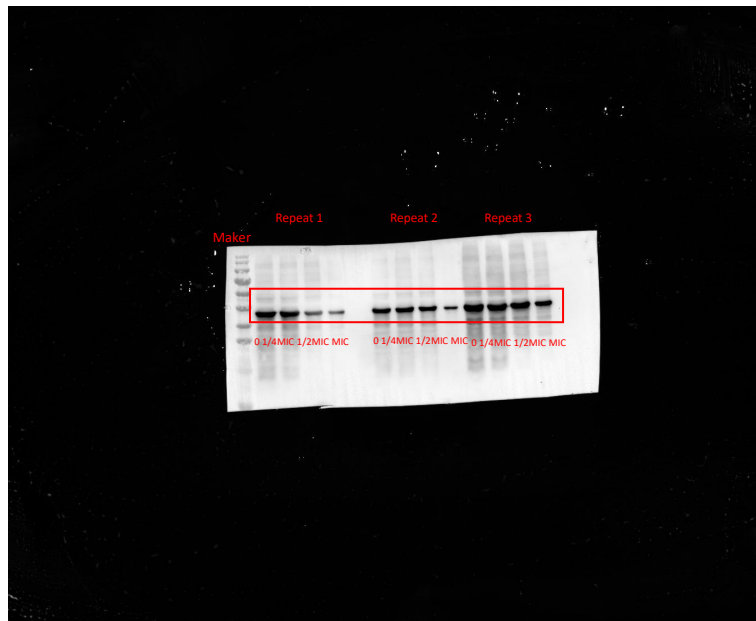

LOX (Up: HeLa; Down: C-33A)

Fig.S5

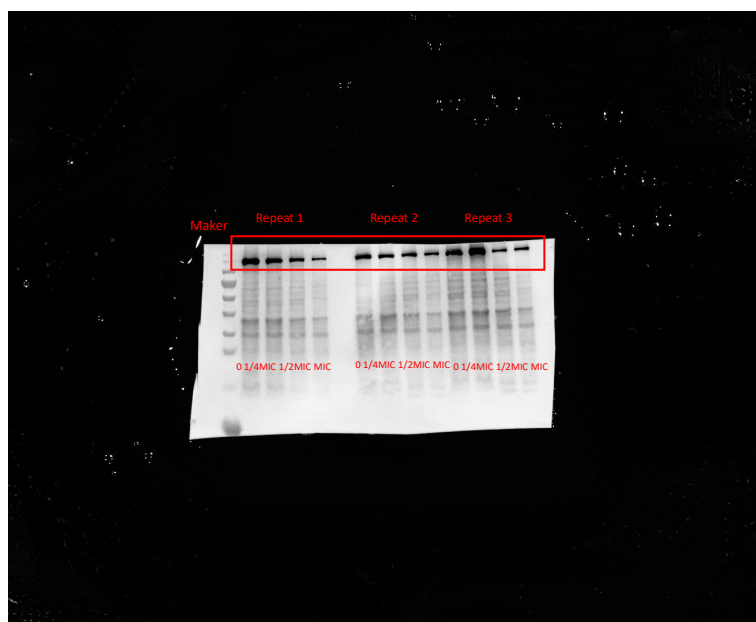

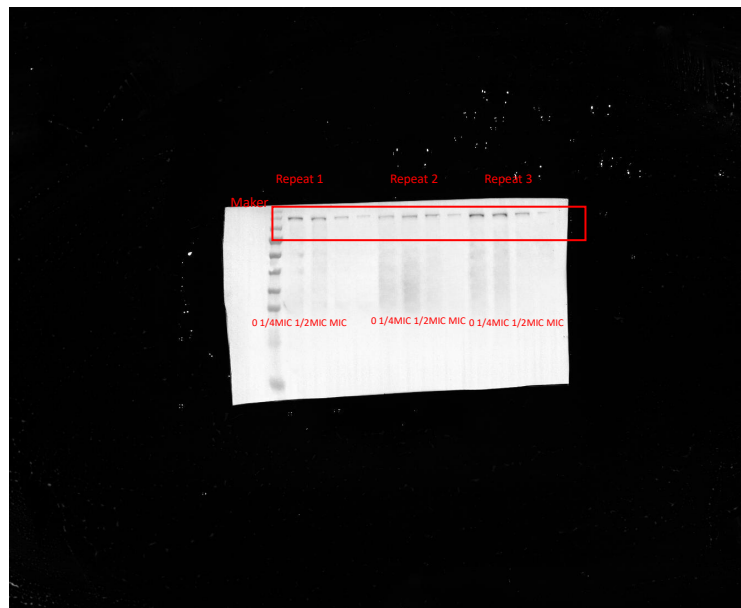

N-cadherin (Up: HeLa; Down: C-33A)

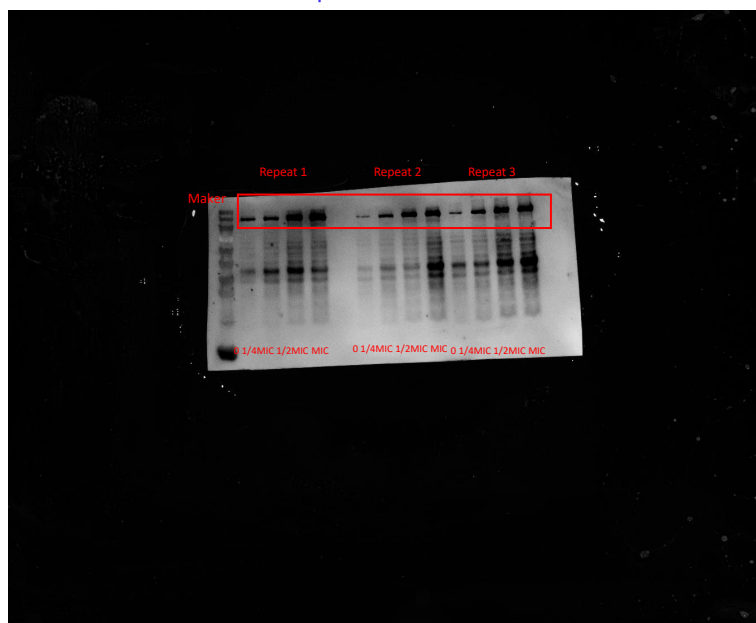

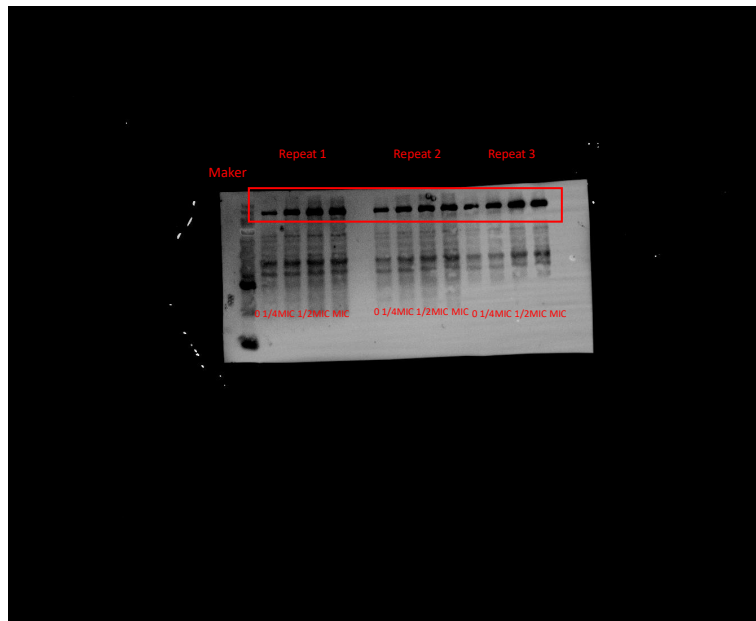

E-cadherin (Up: Hela; Down: C-33A)

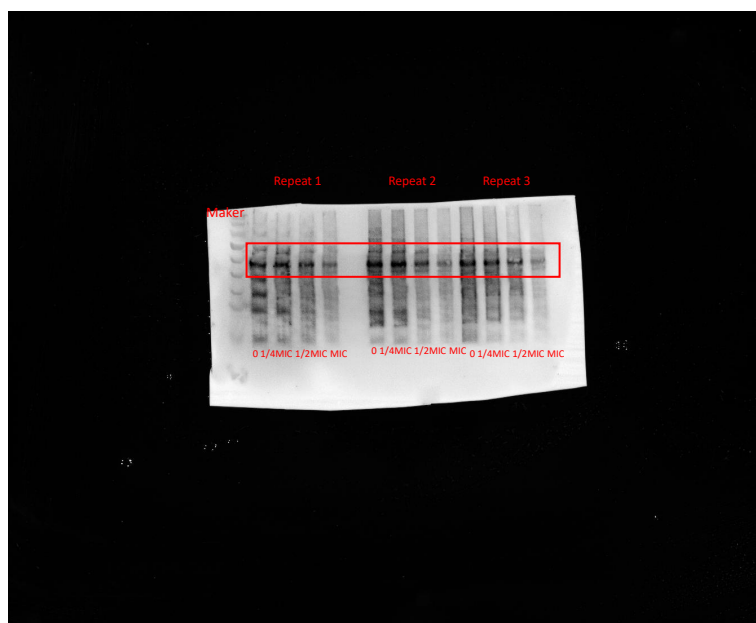

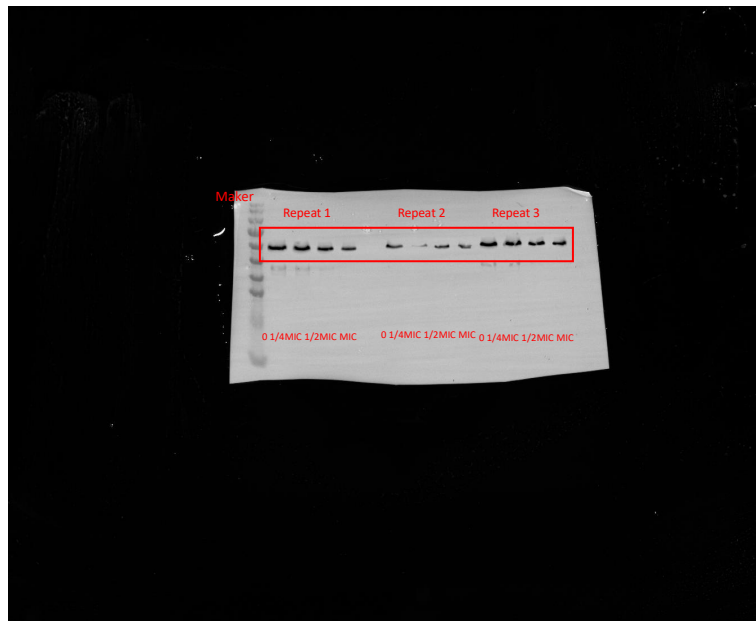

Vimentin (Up: Hela; Down: C-33A)

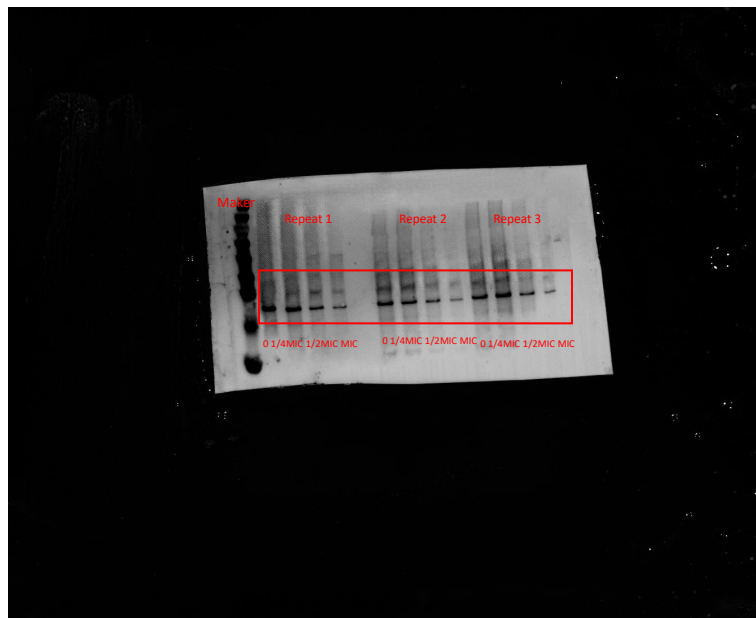

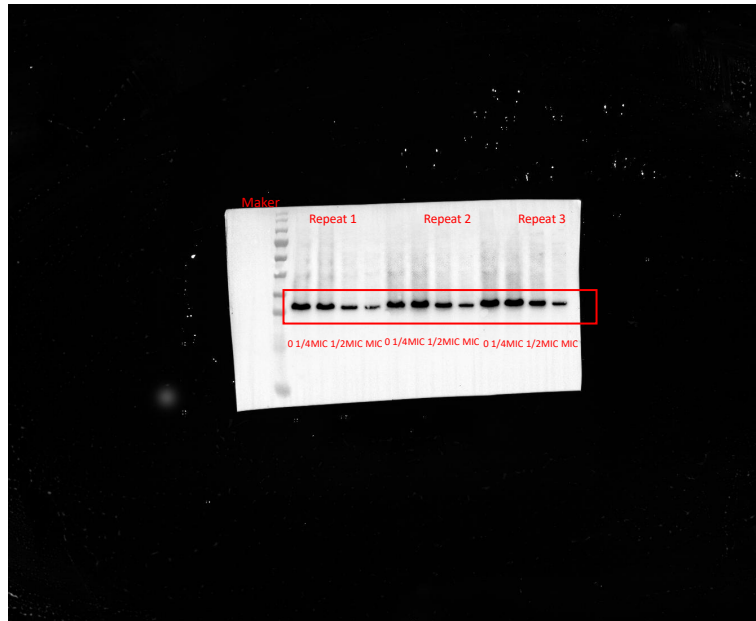

Snail (Up: Hela; Down: C-33A)

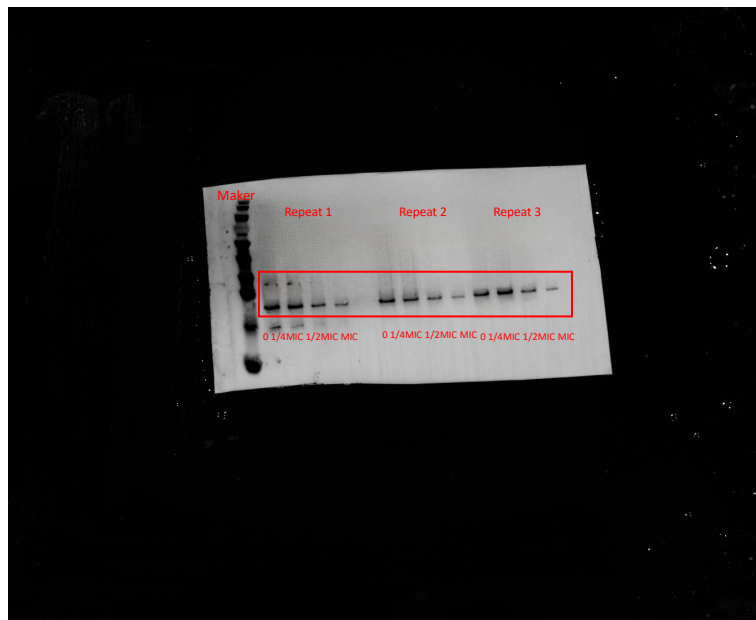



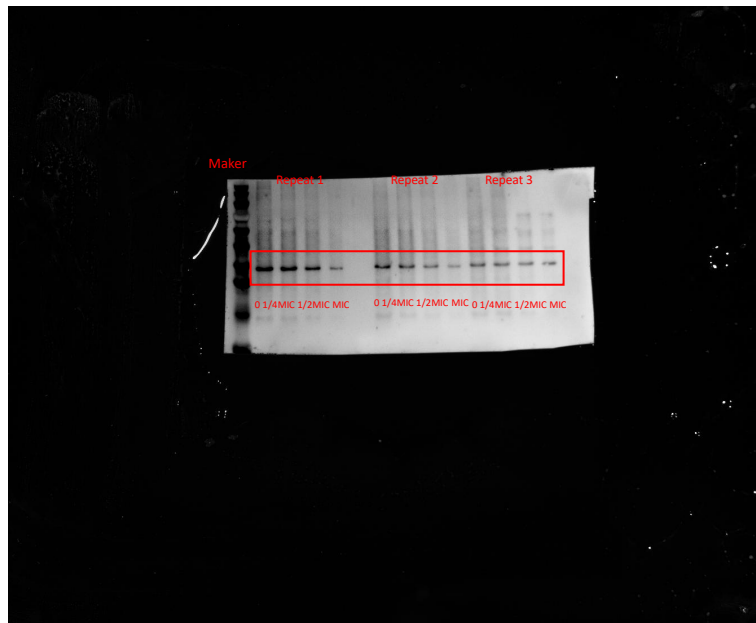

Slug (Up: HeLa; Down: C-33A)

Fig.S6
